# Supplementary figures and images for: A Randomized, Double-Blind, Placebo-Controlled Trial: Efficacy of Opuntia ficus-indica Prebiotic Supplementation in Subjects with Gut Dysbiosis
Source: MDPI journal article supplement (doi:10.3390/nu16050586), 2024-02-21

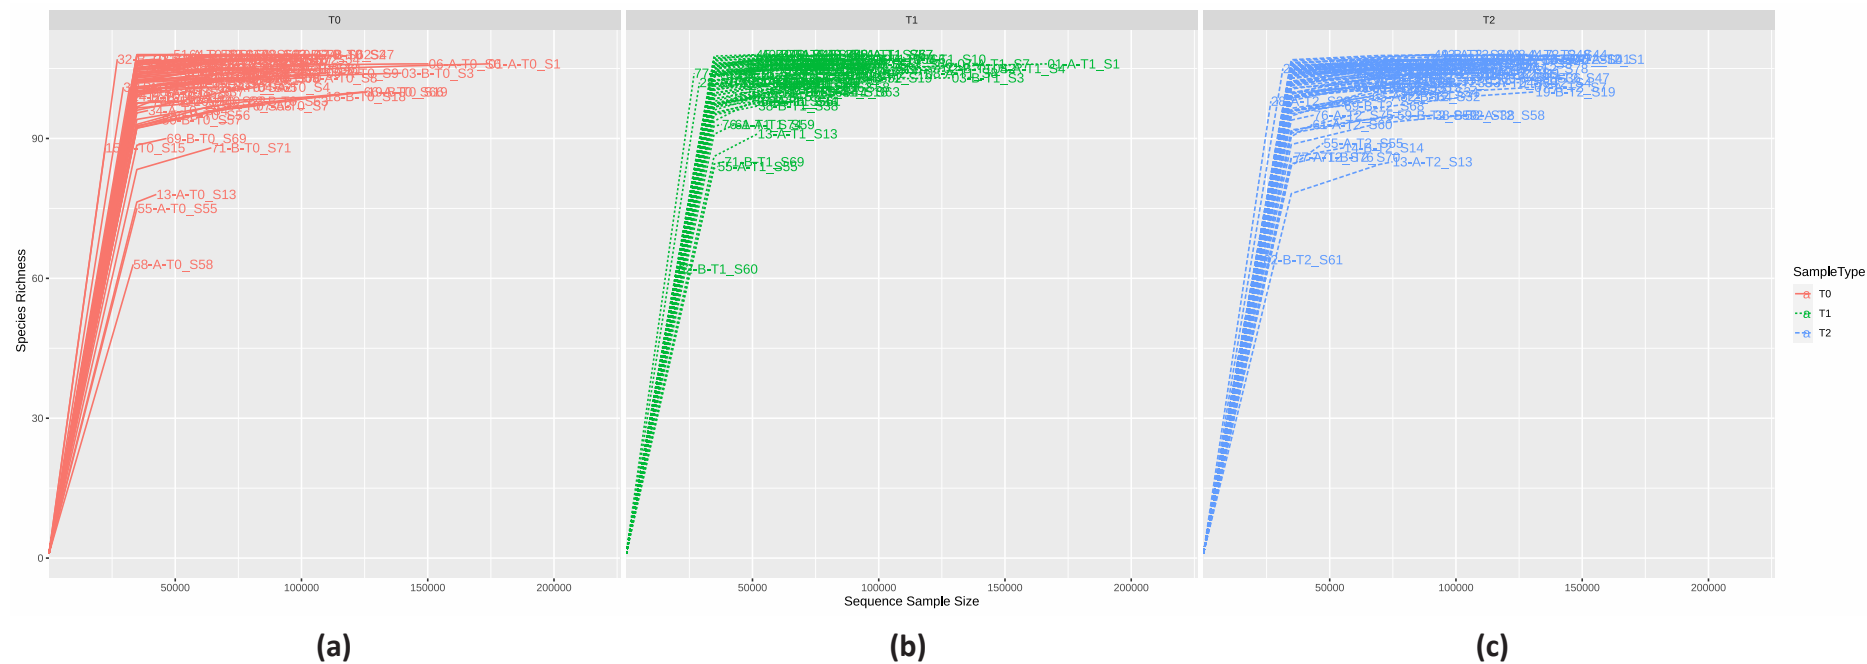

Supplementary material - Figure S1

Supplement: s1 [file s1]
